# Supplementary material
Source: PubMed Central journal article supplement (PMC4746076)

# HKHC Childhood Obesity Logic Model

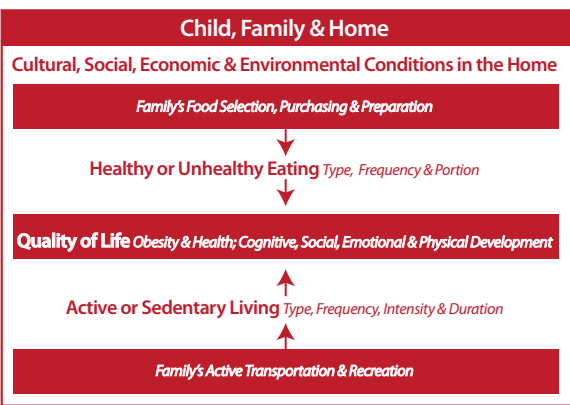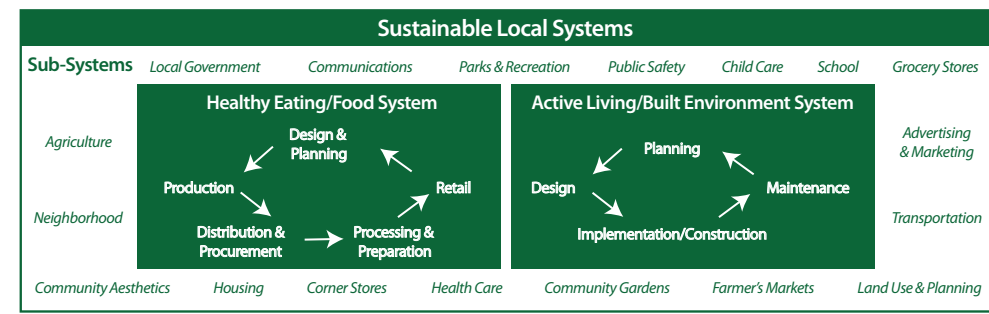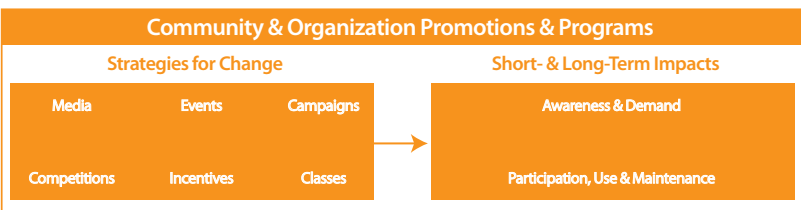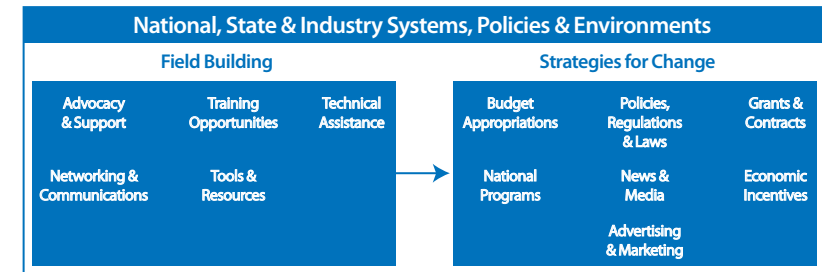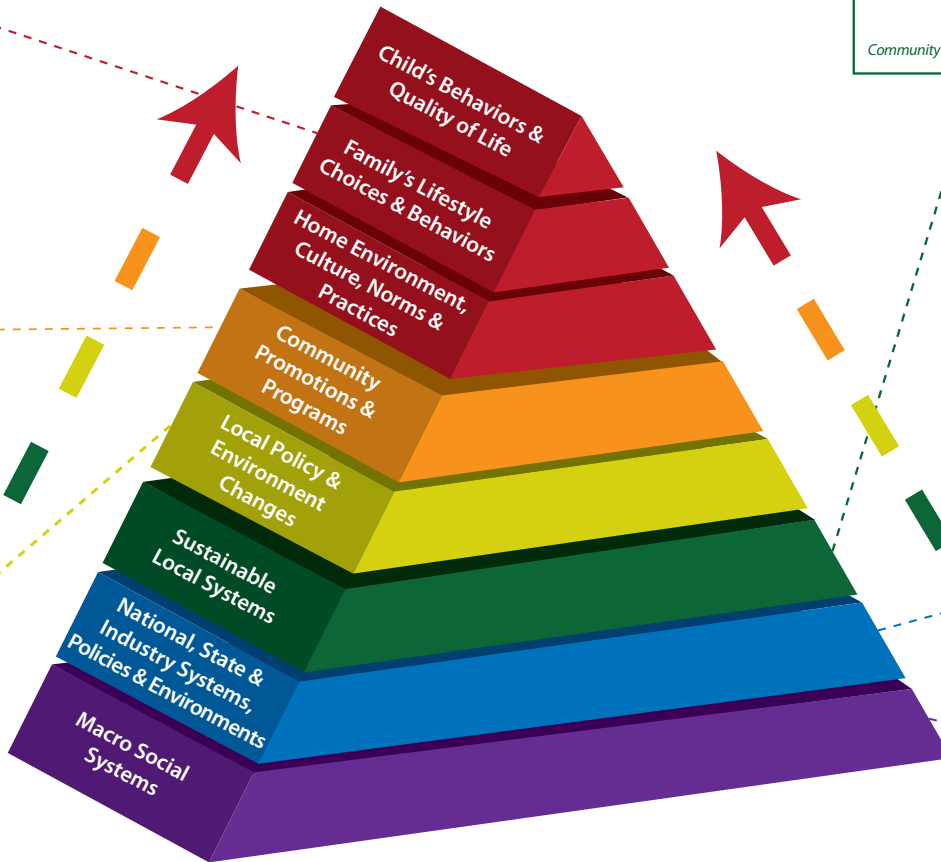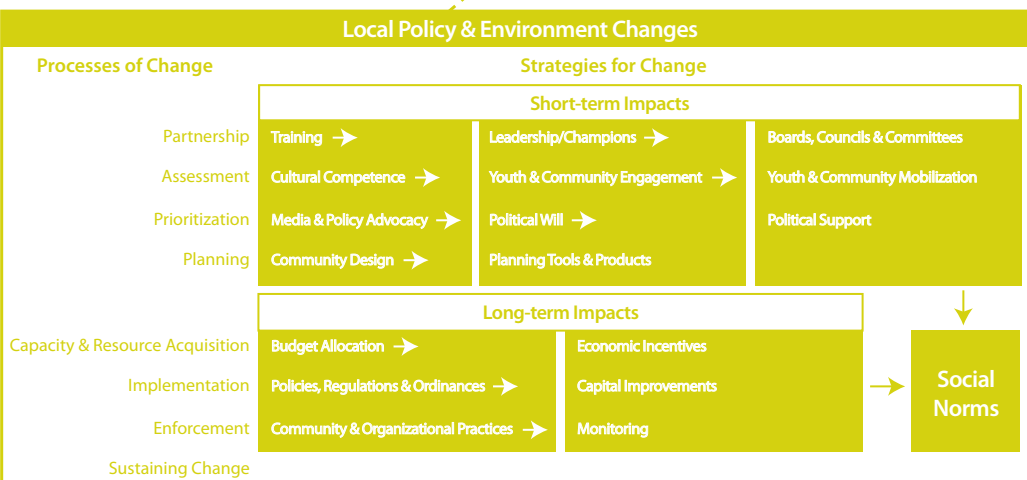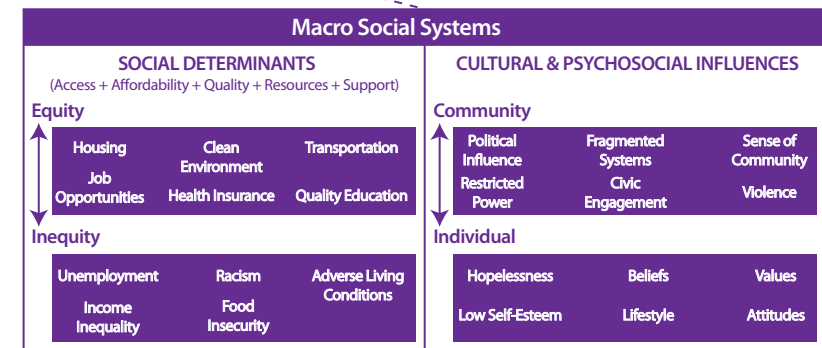

Transformational Processes

Infrastructure Changes

Supplement: NIHMS755645-supplement-SM_F1.pdf [file NIHMS755645-supplement-SM_F1.pdf]
